## Differential Sensitivities of Mammalian Neuronal and Muscle Nicotinic Acetylcholine Receptors to General Anesthetics

J. M. Violet, B.Sc.,\* D. L. Downie, Ph.D.,† R. C. Nakisa, Ph.D.,‡ W. R. Lieb, Ph.D.,§ N. P. Franks, Ph.D.||

**Background:** Nicotinic acetylcholine receptors (nAChRs) are members of a superfamily of fast neurotransmitter-gated receptor channels that includes the  $\gamma$ -aminobutyric acid<sub>A</sub> (GABA<sub>A</sub>), glycine and serotonin type 3 (5-HT<sub>3</sub>) receptors. Most previous work on the interactions of general anesthetics with nAChRs has involved the muscle-type receptor. The authors investigate the effects of general anesthetics on defined mammalian neuronal and muscle nAChRs expressed in *Xenopus* oocytes.

**Methods:** Complementary deoxyribonucleic acid (cDNA) or messenger ribonucleic acid (mRNA) encoding for various neuronal or muscle nAChR subunits was injected into *Xenopus* oocytes, and the resulting ACh-activated currents were studied using the two-electrode voltage-clamp technique. The effects of halothane, isoflurane, sevoflurane, and propofol on the

peak acetylcholine-induced currents were investigated, and concentration-response curves were constructed.

**Results:** The neuronal nAChRs were found to be much more sensitive to general anesthetics than were the muscle nAChRs, with IC<sub>50</sub> concentrations being 10- to 35-fold less for the neuronal receptors. For the inhalational general anesthetics, the IC<sub>50</sub> concentrations were considerably less than the free aqueous concentrations that cause general anesthesia in mammals. In addition, qualitative (dependence on acetylcholine concentration) and quantitative (steepness of concentration-response curves) differences in the anesthetic interactions between the neuronal and muscle nAChRs suggest that different mechanisms of inhibition may be involved.

**Conclusions:** Although there is considerable uncertainty about the physiologic roles that neuronal nAChRs play in the central nervous system, their extraordinary sensitivity to general anesthetics, particularly the inhalational agents, suggests they may mediate some of the effects of general anesthetics at surgical, or even subanesthetic, concentrations. (Key words: Anesthetics, intravenous: propofol. Anesthetics, volatile: halothane; isoflurane; sevoflurane. Receptors, acetylcholine: muscle; neuronal nicotinic; recombinant; *Xenopus* oocytes.)

This article is accompanied by an editorial. Please see: Evers AS, Steinbach JH: Supersensitive sites in the central nervous system: Anesthetics block brain nicotinic receptors. ANESTHESIOLOGY 1997; 86:760-2.

\* Research Student.

† Research Assistant.

‡ Department of Experimental Psychology, University of Oxford, Oxford, United Kingdom.

§ Professorial Research Fellow.

|| Professor of Biophysics.

Received from the Biophysics Section, The Blackett Laboratory, Imperial College of Science, Technology, and Medicine, London, United Kingdom. Submitted for publication July 19, 1996. Accepted for publication November 10, 1996. Supported by a grant from the Medical Research Council (UK). Miss Violet was the recipient of a Medical Research Council (MRC) Studentship, and Dr. Nakisa was the recipient of a Science and Engineering Research Council (SERC) Studentship.

Address reprint requests to Dr. Franks or Dr. Lieb at: Biophysics Section, The Blackett Laboratory, Imperial College of Science, Technology, and Medicine, Prince Consort Road, London SW7 2BZ, United Kingdom. Address electronic mail to: n.franks@ic.ac.uk or w.lieb@ic.ac.uk

NICOTINIC acetylcholine receptor channels (nAChRs) are members of an important superfamily of genetically and structurally related fast neurotransmitter-gated ion channels that also includes the  $\gamma$ -aminobutyric acid<sub>A</sub> (GABA<sub>A</sub>), glycine, and serotonin type 3 (5-HT<sub>3</sub>) receptor channels.<sup>1</sup> Neuronal nAChRs<sup>2-7</sup> are widely distributed in the brain and also are found in the spinal cord and peripheral nervous system, but their physiologic roles in the brain are uncertain.<sup>8</sup> Although other members of this superfamily (most notably GABA<sub>A</sub> receptors) almost certainly play a more crucial role in central synaptic transmission, nAChRs as a class probably have been the most intensively studied. In large part, this is because of the relative accessibility of the muscle nAChR and the closely related nAChR from the *Torpedo* electric organ. However, during the past few years, a growing number of neuronal subunits have been cloned (11 to date,  $\alpha 2$ - $\alpha 9$  and  $\beta 2$ - $\beta 4$ ). Consequently, emphasis has shifted toward the characterization of neuronal nAChRs expressed in neurons and recombinant expression sys-

tems, such as *Xenopus* oocytes. What has emerged from these studies is that, although structurally highly homologous to their muscle counterparts, the neuronal receptors differ in a number of important respects. For example, although all nAChRs function as pentamers, the muscle-type receptors have invariant subunit stoichiometries ( $2\alpha\beta\gamma\delta$  or  $2\alpha\beta\epsilon\delta$ ), but the neuronal receptors display a bewildering diversity of  $\alpha/\beta$  heteromers and  $\alpha$  homomers. In addition, the different subunit combinations often differ in their agonist and antagonist sensitivities, single channel properties, and rates of agonist-induced desensitization.<sup>2,3,6,7</sup> One simplifying feature is that when neuronal  $\alpha$  and  $\beta$  subunits form heteromeric receptor channels, they appear to have a stoichiometry of two  $\alpha$  subunits to three  $\beta$  subunits.<sup>9,10</sup> Whether this will turn out to be a universal rule remains to be seen. The various subunits have a complex pattern of expression within the central nervous system (CNS),<sup>11-13</sup> with the  $\alpha_4\beta_2$  combination being one of the most prevalent in the brain.<sup>14</sup>

In parallel with studies on the structure and function of nAChRs, work with general anesthetics at the molecular level has focused almost exclusively on the muscle nAChR and that from the *Torpedo* electric organ. Many different techniques have been used, including equilibrium binding,<sup>15-17</sup> rapid-flux measurements,<sup>18</sup> patch-clamping,<sup>19-22</sup> and site-directed mutagenesis.<sup>23</sup> Although there has been some work on the effects of general anesthetics on neuronal receptors from molluscan neurones<sup>24-26</sup> and bovine adrenal chromaffin cells<sup>27,28</sup> and although there has been a preliminary report on anesthetic inhibition of recombinant neuronal receptors,<sup>29</sup> there have been no published studies on the interactions between general anesthetics and defined neuronal nAChRs in which the sensitivities to general anesthetics of neuronal and muscle-type receptors can be directly compared. In this article, we report our first results on the effects of three volatile general anesthetics (halothane, isoflurane, and sevoflurane) and an intravenous agent (propofol) on defined muscle and neuronal nAChRs expressed in the *Xenopus* oocyte recombinant expression system.

## Materials and Methods

### *Preparation and Injection of Xenopus Oocytes*

All experimental procedures involving *Xenopus laevis* frogs were in compliance with UK regulations. Adult female frogs (Blades Biological, Cowden, Kent,

UK) were maintained in fresh-water holding tanks at 20–22°C, with a 12-h light/12-h dark cycle. The frogs were anesthetized by immersion in a 0.2% (weight-to-volume ratio) solution of tricaine (3-aminobenzoic acid ethyl ester, methanesulfonate salt), and portions of the ovaries were surgically removed and teased apart with forceps. These portions were briefly washed in "calcium-free" oocyte incubation buffer (calcium-free OIB; composition in mM: NaCl, 88; KCl, 1; NaHCO<sub>3</sub>, 2.4; MgSO<sub>4</sub>, 0.8; HEPES, 15; titrated to pH 7.5 with NaOH) before incubation in the same saline containing collagenase (2 mg/ml of type 1A collagenase, Sigma Chemical Co., Poole, Dorset, UK) for 3 h at room temperature with constant agitation. After careful washing in calcium-free OIB to remove all traces of collagenase, the oocytes were transferred into normal OIB (composition in mM: NaCl, 88; KCl, 1; NaHCO<sub>3</sub>, 2.4; MgSO<sub>4</sub>, 0.8; CaCl<sub>2</sub>, 0.4; Ca(NO<sub>3</sub>)<sub>2</sub>, 0.3; HEPES, 15; titrated to pH 7.5 with NaOH). Oocytes at stages 5 or 6 of development were then chosen for injection by visual inspection. Selected oocytes were injected with 10 nl of diethyl pyrocarbonate-treated water containing 0.1–1.0 pg of complementary deoxyribonucleic acid (cDNA) directly into the nucleus of the oocyte. For messenger ribonucleic acid (mRNA) injections, into the cytoplasm, 50 nl of diethyl pyrocarbonate-treated water that contained 10–40 ng of mRNA was used. Injections were carried out with a calibrated micropipette (10- to 16- $\mu$ m tip diameter) and a Picospritzer II valve (General Valve Corp., Fairfield, NJ), which provided short pressure pulses of nitrogen gas. Injected oocytes were maintained in a cooled incubator (BDH, Poole, Dorset, UK) at 19 or 20°C in normal OIB containing antibiotics (penicillin, 100 IU/ml; streptomycin, 100  $\mu$ g/ml; Life Technologies, Paisley, Scotland, UK) in individual wells (200  $\mu$ l per well) of 96-well microtiter plates (Life Technologies) for 2–7 days before use. Using these procedures, approximately 90% of the injected oocytes were viable and typically had resting potentials of –40 to –90 mV. All chemicals, unless otherwise stated, were obtained from Sigma Chemical Co.

Rat neuronal nAChR cDNA for the  $\alpha_2$ ,  $\alpha_3$ ,  $\alpha_4$ ,  $\beta_2$ , and  $\beta_4$  subunits was kindly supplied by Jim Patrick (Baylor College of Medicine, Houston, TX) in the pSM vector, and mouse muscle nAChR cDNA for the  $\alpha$ ,  $\beta$ ,  $\gamma$ , and  $\delta$  subunits was kindly supplied by Jim Boulter (Salk Institute, San Diego, CA) in either the pSP64 or pSP65 vector. The pSM vector was used for nuclear injections, and the pSP64 and pSP65 vectors were used to produce mRNA for cytoplasmic injection. So that

mRNA coding for neuronal subunits could be expressed, the neuronal  $\alpha 2$ ,  $\alpha 4$ ,  $\beta 2$ , and  $\beta 4$  subunits were subcloned into a modified pcDNA1/Amp vector (Invitrogen, Leek, The Netherlands), which allowed mRNA transcription under a T7 promoter. For all injections, whether nuclear or cytoplasmic, equal amounts of either cDNA or mRNA, respectively, were used for each of the chosen receptor subunits.

#### Recording Technique for *Xenopus Oocytes*

Oocytes were placed in a bath (volume  $\approx 50 \mu\text{l}$ ) and continuously perfused at  $\sim 2 \text{ ml/min}$  with either control or test solutions. Ionic currents evoked by bath application of acetylcholine chloride ( $0.3 \mu\text{M}$ – $5 \text{ mM}$ ) were recorded using the two-electrode voltage-clamp technique with an Axoclamp 2A amplifier (Axon Instruments, Foster City, CA). Electrodes were fabricated from thin-walled filamented borosilicate glass capillary tubes (GC150TF, Clark Electromedical Instruments, Reading, Berkshire, UK) using a two-stage pull (David Kopf Instruments vertical pipette puller, Model 720, Tujunga, CA). Electrodes were filled with  $2.5 \text{ M KCl}$  and had typical resistances of  $0.4$ – $0.8 \text{ M}\Omega$ ; the current-passing electrode usually also contained  $100 \text{ mM BAPTA}$ . Currents were filtered at  $5 \text{ Hz}$  ( $-3 \text{ dB}$ , 8-pole Bessel filter; Frequency Devices, Model 902, Haverhill, MA) before being digitized (at  $20 \text{ Hz}$ ) and stored on a computer. The saline used for electrophysiologic recordings had the following composition (mM): NaCl, 110; KCl, 2;  $\text{MgCl}_2$ , 1;  $\text{BaCl}_2$ , 2; and HEPES, 10 (titrated to pH 7.6 with NaOH). In addition, in almost all experiments,  $100 \text{ nM}$  atropine was used, although this did not affect the anesthetic sensitivity ( $P > 0.4$ ). Acetylcholine solutions were prepared on the day of the experiment. In some preliminary experiments, the  $\text{BaCl}_2$  was replaced by  $\text{CaCl}_2$ ; this also did not alter the anesthetic sensitivity ( $P > 0.3$ ). Experiments were performed at room temperature ( $21$ – $23^\circ\text{C}$ ).

Acetylcholine was applied (typically for  $20$ – $30 \text{ s}$ ) until a clear maximum in the response was observed. The peak current was taken as a measure of receptor activity. When constructing acetylcholine concentration–response curves, the data were normalized to a standard acetylcholine concentration, which was applied alternately throughout the experiment to correct for any “run down” or “run up” in the current. In our preliminary experiments, we found that in the presence of anesthetics, successive acetylcholine responses took  $1$  or  $2 \text{ min}$  to achieve a steady-state value. We had previously observed a similar behavior with the inhibition

by long-chain alcohols of a neuronal nAChR from molluscan neurons,<sup>26</sup> and we have subsequently found (R. Dickinson, unpublished observation) that the time-course for anesthetic inhibition to achieve a steady-state value appears to depend on the acetylcholine concentration. Consequently, anesthetics were always preapplied for  $2$  or  $3 \text{ min}$  before the coapplication of acetylcholine. Once again, acetylcholine was applied until a clear peak was observed and repeatedly applied until a consistent response was obtained. The anesthetics on their own usually ( $>95\%$  of the oocytes) had no significant effect on the resting current, but even when they did, their preapplication established an accurate baseline. In almost all cases, except at the highest concentrations of propofol ( $>50 \mu\text{M}$ ), anesthetic inhibition was reversible, and the percentage inhibition was calculated by averaging the control responses before and after anesthetic application and averaging at least two current responses in the presence of anesthetic. In those few cases when irreversibility was seen, we ignored the subsequent control responses.

#### Data Analysis

Acetylcholine concentration–response data were fitted (unweighted least-squares) to a Hill equation of the form

$$E = \frac{100A^{n_H}}{A^{n_H} + (EC_{50})^{n_H}} \quad (1)$$

where  $E$  is the peak acetylcholine-induced current expressed as a percentage of the maximal current;  $A$  is the acetylcholine concentration;  $n_H$  is the Hill coefficient, and  $EC_{50}$  is the acetylcholine concentration for a half-maximal effect.

Anesthetic inhibition data were fitted (unweighted least-squares) to a Hill equation of the form

$$y = \frac{100(IC_{50})^{n_H}}{I^{n_H} + (IC_{50})^{n_H}} \quad (2)$$

where  $y$  is the percentage of the control peak acetylcholine current remaining in the presence of an anesthetic concentration  $I$ ;  $n_H$  is the Hill coefficient, and  $IC_{50}$  is the anesthetic concentration for 50% inhibition.

Values throughout the paper are given as means  $\pm$  SEMs. Statistical significance was assessed using Student's  $t$  test.<sup>30</sup>

#### Preparation and Delivery of Anesthetic Solutions

The volatile anesthetics were made up as fractions of saturated aqueous solutions at room temperature. The

## NICOTINIC ACH RECEPTORS AND GENERAL ANESTHETICS

**Table 1. Percentage Inhibition by 310  $\mu\text{M}$  ( $\sim 1$ , minimum alveolar concentration [MAC]) Isoflurane of Acetylcholine-induced Currents for Various Combinations of Neuronal Nicotinic Acetylcholine Receptor Subunits**

|           | $\alpha_2$            | $\alpha_3$           | $\alpha_4$           |
|-----------|-----------------------|----------------------|----------------------|
| $\beta_2$ | 88 $\pm$ 2.4 (n = 5)  | 84 $\pm$ 0.8 (n = 6) | 88 $\pm$ 0.8 (n = 5) |
| $\beta_4$ | 75 $\pm$ 1.6 (n = 10) | 73 $\pm$ 1.9 (n = 7) | 72 $\pm$ 1.4 (n = 9) |

The ACh concentration was 1  $\mu\text{M}$ . The errors are SEMs for n oocytes.

saturated solutions were prepared by adding  $\sim 0.2$  g of the liquid anesthetic to  $\sim 20$  ml of buffer in a tightly sealed glass scintillation vial with a minimal air space. The vial was then vigorously shaken for 5 min before centrifuging at  $\sim 800 \times g$  for 10 min at room temperature. The concentrations of the saturated solutions were taken to be 15.3 mM isoflurane,<sup>25</sup> 17.5 mM halothane,<sup>31</sup> and 11.8 mM sevoflurane.<sup>32</sup> Glass reservoirs containing volatile anesthetics were sealed with a rigid plastic float, and all tubing and valves were made of polytetrafluoroethylene (PTFE). With these precautions, losses of volatile agents from the perfusion system were found to be negligible ( $< 5\%$ ) when measured by gas chromatography.<sup>33</sup> The sources of the anesthetics were as follows: isoflurane and sevoflurane (Abbott Laboratories Ltd., Queenborough, Kent, UK); halothane (ICI Ltd., Macclesfield, Cheshire, UK). Halothane was used as supplied and contained 0.01% thymol. Propofol in its pure form (*i.e.*, 2,6-di-isopropylphenol without Intralipid®) was kindly supplied by Zeneca (Macclesfield, Cheshire, UK). Propofol stock solutions were made up in ethanol. The final concentration of ethanol in propofol-containing solutions was 17 mM. For these experiments, 17 mM ethanol was also added to the control solutions.

## Results

In our first experiments, we found that all of the neuronal nAChR subunit combinations we tested were surprisingly sensitive to isoflurane. At 310  $\mu\text{M}$  ( $\sim 1$  MAC for the rat<sup>34</sup>) isoflurane, the neuronal receptors were inhibited by 70–90% (table 1). Moreover, those combinations that contained the  $\beta_2$  subunit appeared to be significantly more sensitive ( $P < 0.01$ ) than those containing the  $\beta_4$  subunit. These preliminary experiments were carried out at a single, very low nondesensitizing concentration of acetylcholine (1  $\mu\text{M}$ ). So that a fair comparison could be made of the anesthetic sensitivities of the different subunit combinations (whose sensi-

tivities may depend on the acetylcholine concentration), we determined the acetylcholine  $\text{EC}_{50}$  concentrations for selected subunit combinations so that anesthetics could be applied to receptors that were in roughly equivalent functional states. All of the acetylcholine receptors behaved in a qualitatively similar fashion in their responses to acetylcholine; low concentrations of the agonist induced small, nondesensitizing currents, whereas high concentrations of acetylcholine induced large and relatively rapidly inactivating currents (see insets to fig. 1). The neuronal receptors, however, were much less sensitive to acetylcholine than the muscle receptor, with  $\text{EC}_{50}$  concentrations roughly an order of magnitude higher (fig. 1 and table 2). For all receptors, the Hill coefficients were close to unity.

Figure 2 shows the sensitivity of a neuronal nAChR ( $\alpha_4\beta_2$ ) to halothane compared with the relative insensitivity of the muscle receptor to a halothane concentration 10 times higher. The  $\text{IC}_{50}$  concentrations for halo-

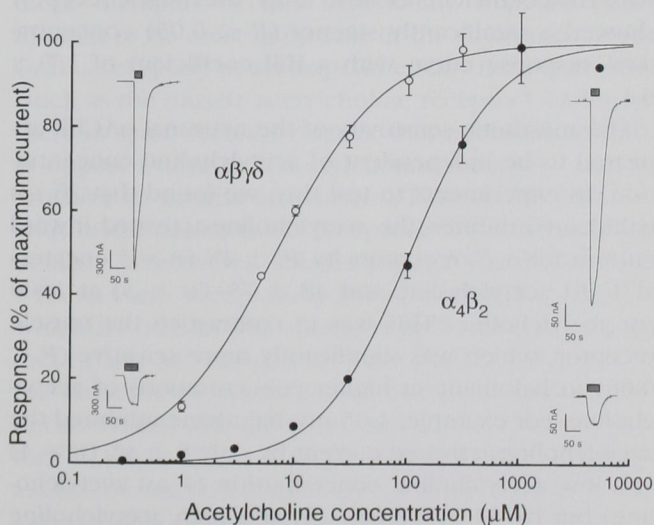

**Fig. 1. Acetylcholine concentration–response curves.** Data from oocytes expressing muscle receptors ( $\alpha\beta\gamma\delta$  subunits;  $\circ$ ) and neuronal receptors ( $\alpha_4\beta_2$  subunits;  $\bullet$ ). The data points give the mean peak currents expressed as a percentage of the maximum current, and the error bars are SEMs (for at least three oocytes). Where not shown, the error was smaller than the size of the symbol. The lines are unweighted least squares fits of the mean peak currents to a Hill equation (Equation 1, Materials and Methods section). The insets on the left are typical current traces from an oocyte expressing muscle receptors ( $\alpha\beta\gamma\delta$  subunits) showing responses to a high (100  $\mu\text{M}$  acetylcholine, top left) and a low (1  $\mu\text{M}$  acetylcholine, bottom left) concentration of acetylcholine. The insets on the right are typical traces from an oocyte expressing neuronal receptors ( $\alpha_4\beta_2$  subunits) at a high (1000  $\mu\text{M}$  acetylcholine, top right) and a low (30  $\mu\text{M}$  acetylcholine, bottom right) concentration of acetylcholine. Oocytes were voltage-clamped at  $-60$  mV.

**Table 2. Acetylcholine Activation and Halothane Inhibition of Selected Combinations of Nicotinic Acetylcholine Receptor Subunits**

| Subunit Combination                      | Acetylcholine Activation |                | Halothane Inhibition  |                |
|------------------------------------------|--------------------------|----------------|-----------------------|----------------|
|                                          | EC <sub>50</sub> (μM)    | n <sub>H</sub> | IC <sub>50</sub> (μM) | n <sub>H</sub> |
| α <sub>2</sub> β <sub>4</sub> (neuronal) | 91 ± 11                  | 1.0 ± 0.1      | 47 ± 5                | 1.0 ± 0.1      |
| α <sub>4</sub> β <sub>2</sub> (neuronal) | 104 ± 13                 | 1.1 ± 0.1      | 27 ± 5                | 0.9 ± 0.1      |
| α <sub>4</sub> β <sub>4</sub> (neuronal) | 45 ± 7                   | 0.9 ± 0.1      | 105 ± 17              | 1.0 ± 0.2      |
| αβγδ (muscle)                            | 6.7 ± 0.6                | 0.9 ± 0.1      | 870 ± 50              | 1.7 ± 0.1      |

EC<sub>50</sub> and IC<sub>50</sub> concentrations and Hill coefficients n<sub>H</sub>, were obtained from unweighted least squares fits of dose-response data (from at least 3 oocytes) to Hill equations (see Materials and Methods section). Halothane inhibitions were determined at an acetylcholine concentration equal, or close, to the EC<sub>50</sub>. The errors are SEMs.

thane inhibition are listed in table 2. In addition to the sensitivities of the neuronal receptors, which had IC<sub>50</sub> concentrations up to 35 times lower than that of the muscle receptor, there also was a clear difference in the Hill coefficients, which are a measure of the steepness of the concentration-response curves. Although the neuronal receptors were inhibited by halothane with Hill coefficients close to unity, the muscle receptor showed a significantly steeper ( $P < 0.05$ ) concentration-response curve with a Hill coefficient of  $1.7 \pm 0.1$ .

The anesthetic sensitivity of the neuronal nAChR appeared to be independent of acetylcholine concentration. In experiments to test this, we found that 26 μM halothane inhibited the acetylcholine-activated inward current for α<sub>4</sub>β<sub>2</sub> receptors by  $49 \pm 2\%$  ( $n = 3$  oocytes) at 1 μM acetylcholine and  $48 \pm 7\%$  ( $n = 3$ ) at 1600 μM acetylcholine. This was in contrast to the muscle receptor, which was significantly more sensitive ( $P < 0.05$ ) to halothane at higher concentrations of acetylcholine. For example, 1.05 mM halothane inhibited the acetylcholine-activated current by only  $8 \pm 4\%$  ( $n = 4$ ) at a low acetylcholine concentration (1 μM acetylcholine) but by  $37 \pm 6\%$  ( $n = 3$ ) at a high acetylcholine concentration (100 μM acetylcholine).

We determined anesthetic concentration-response curves for neuronal (α<sub>4</sub>β<sub>2</sub>) and muscle (αβγδ) receptors for four clinically important general anesthetics: halothane, isoflurane, sevoflurane, and propofol (fig. 3 and table 3). For all four anesthetics, the neuronal receptor was much more sensitive than the muscle receptor, with the concentration-response curves being generally steeper with the muscle receptor.

## Discussion

Although there is no current consensus as to which molecular targets are most important in the actions of

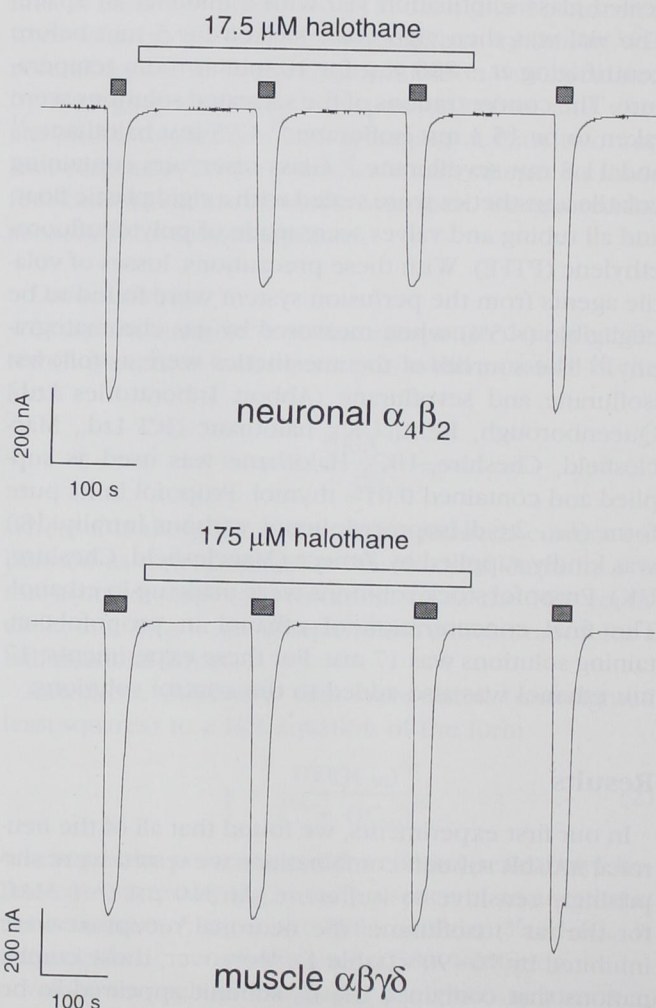

**Fig. 2.** Differential sensitivity of a neuronal acetylcholine receptor (α<sub>4</sub>β<sub>2</sub> subunits) and the muscle receptor (αβγδ subunits) to halothane. (Top) Neuronal receptor. The effect of 17.5 μM halothane on acetylcholine-induced currents (160 μM acetylcholine, ■). (Bottom) Muscle receptor. The effect of 175 μM halothane on acetylcholine-induced currents (10 μM acetylcholine, ■). Oocytes were voltage-clamped at -60 mV.

## NICOTINIC ACH RECEPTORS AND GENERAL ANESTHETICS

**Table 3. Differential Sensitivities of Neuronal ( $\alpha_4\beta_2$ ) and Muscle ( $\alpha\beta\gamma\delta$ ) Acetylcholine Receptors to Various General Anesthetics**

| Anesthetic  | Neuronal $\alpha_4\beta_2$         |                | Muscle $\alpha\beta\gamma\delta$   |                | Anesthesia<br>EC <sub>50</sub> ( $\mu\text{M}$ )* |
|-------------|------------------------------------|----------------|------------------------------------|----------------|---------------------------------------------------|
|             | IC <sub>50</sub> ( $\mu\text{M}$ ) | n <sub>H</sub> | IC <sub>50</sub> ( $\mu\text{M}$ ) | n <sub>H</sub> |                                                   |
| Halothane   | 27 ± 5                             | 0.9 ± 0.1      | 870 ± 50                           | 1.7 ± 0.1      | 190 <sup>34</sup>                                 |
| Isoflurane  | 34 ± 6                             | 0.8 ± 0.1      | 1160 ± 25                          | 1.8 ± 0.1      | 270 <sup>34</sup>                                 |
| Sevoflurane | 98 ± 8                             | 1.1 ± 0.1      | 2060 ± 110                         | 1.3 ± 0.1      | 300 <sup>34</sup>                                 |
| Propofol    | 4.5 ± 0.7                          | 0.8 ± 0.1      | 46 ± 5                             | 2.0 ± 0.5      | 1.5†                                              |

IC<sub>50</sub> concentrations and Hill coefficients, n<sub>H</sub>, were obtained from unweighted least squares fits of dose–response data (from at least 3 oocytes) to a Hill equation (Equation 2, Materials and Methods section). The errors are SEMs. The acetylcholine concentrations were 160  $\mu\text{M}$  for the neuronal nAChR and 10  $\mu\text{M}$  for the muscle nAChR.

\* Human free aqueous EC<sub>50</sub> concentration for inhibiting a purposeful response to a painful stimulus (surgical incision).

† The propofol blood concentration at which 50% of patients do not move purposefully in response to a surgical incision is 15.2  $\mu\text{g}/\text{ml}$ .<sup>52</sup> Taking a blood/plasma partition coefficient<sup>53</sup> of 1.3, a value<sup>53</sup> for plasma protein binding of 97.8% and a molecular weight of 178 Da gives a free aqueous propofol EC<sub>50</sub> concentration of 1.5  $\mu\text{M}$ . (This figure can only be considered to be an estimate because a small error in the value for plasma protein binding would lead to significant error in the free aqueous concentration.)

general anesthetics, there has been growing interest during the past few years in the possible role of the superfamily of fast, neurotransmitter-gated ion channels

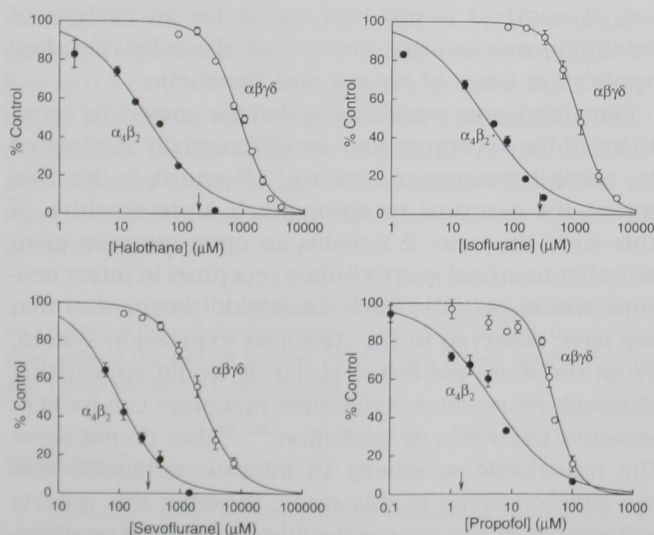

**Fig. 3.** Concentration–response curves showing the differential sensitivities of neuronal ( $\alpha_4\beta_2$  subunits, ●) and muscle receptors ( $\alpha\beta\gamma\delta$  subunits; ○) to four different anesthetics: halothane, isoflurane, sevoflurane, and propofol. The data points are the mean peak currents expressed as percentages of the control current, and the error bars are SEMs (for at least three oocytes). Where not shown, the error was smaller than the size of the symbol. The lines are unweighted least squares fits of the mean peak currents to a Hill equation (Equation 2, Materials and Methods section). The acetylcholine concentrations were 160  $\mu\text{M}$  for the neuronal nAChR and 10  $\mu\text{M}$  for the muscle nAChR. The vertical arrows indicate estimated human EC<sub>50</sub> concentrations for general anesthesia (see table 3).

that includes the GABA<sub>A</sub>, glycine, nAChRs, and 5-HT<sub>3</sub> receptors.<sup>35,36</sup> Attention has reasonably focused on those members of this superfamily that are either thought to be most important in the CNS (such as the GABA<sub>A</sub> receptor) or are experimentally most accessible (such as the muscle acetylcholine receptor). However, there is some recent evidence that neuronal nAChRs, as opposed to muscle acetylcholine receptors, may be sensitive to general anesthetics. This has been shown with molluscan nicotinic receptors,<sup>24–26</sup> which are particularly sensitive to volatile general anesthetics, and with nicotinic receptors in bovine chromaffin cells,<sup>27,28</sup> which are inhibited by a range of different general anesthetics and are thought to have similar properties to the nicotinic receptors found in sympathetic ganglia. Recent results with glycine receptors<sup>37</sup> and 5-HT<sub>3</sub> receptors<sup>38,39</sup> show that, at least for many inhalational agents, anesthetic sensitivity may be a general feature of this superfamily of receptor channels. In contrast, the neurotransmitter-gated receptor channels activated by glutamate, the major excitatory neurotransmitter in the vertebrate CNS, have a rather different transmembrane topology<sup>40,41</sup> and appear to be relatively insensitive to most general anesthetics.<sup>35,42</sup>

The results presented here show that neuronal nAChR channels are much more sensitive to general anesthetics than their muscle counterparts under conditions where the membrane environment and intracellular milieu are identical. This seems to be true for all of the neuronal subunit combinations we have tested (see table 1), although we have concentrated on the  $\alpha_4\beta_2$  combination because it is thought to be one of the most widely

expressed combinations in the brain.<sup>14</sup> The IC<sub>50</sub> concentrations for the volatile general anesthetics halothane, isoflurane, and sevoflurane are, on average, about 30 times lower for the neuronal  $\alpha_4\beta_2$  receptor than for the muscle receptor, whereas for propofol, the IC<sub>50</sub> concentrations differ by an order of magnitude. Moreover, the neuronal nAChRs display a remarkable sensitivity to the volatile agents in absolute terms, with the IC<sub>50</sub> for halothane inhibiting the  $\alpha_4\beta_2$  combination being as low as 27  $\mu\text{M}$ . This is seven times lower than the free aqueous concentration that is present at 1 MAC (see table 3).

Why are the neuronal nAChRs so much more sensitive to anesthetic inhibition? In addressing this question, one should first consider what has been learned from the numerous studies on the effects of general anesthetics on the muscle-type receptor. Probably the most definitive information has come from some of the more recent studies using patch-clamp recording from mouse muscle receptors expressed in *Xenopus* oocytes<sup>23</sup> and from single channel analysis of nicotinic currents in cultured cells<sup>43-45</sup> belonging to the muscle cell line BC3H-1. These studies present a convincing case that anesthetics such as isoflurane act predominantly by binding to a discrete site within the ion channel pore itself,<sup>23</sup> although the preferential binding to the open state of the channel is relative rather than absolute.<sup>43-45</sup> A comparison can be made between our study and that of Forman *et al.*,<sup>23</sup> who found with the mouse recombinant muscle receptor that 1 mM isoflurane inhibited the peak 100  $\mu\text{M}$  acetylcholine-induced current by 60%, which is reasonably consistent with our observation (see table 3) of an IC<sub>50</sub> concentration for isoflurane of 1.2 mM (at an acetylcholine concentration of 10  $\mu\text{M}$ ). Moreover, our observation that the muscle receptor is more sensitive to anesthetic inhibition at high rather than low acetylcholine concentrations (see Results) also is consistent with the proposed open channel block mechanism.<sup>44</sup>

In the elegant study of Forman *et al.*,<sup>23</sup> it was shown that anesthetics such as isoflurane probably interact with certain amino acids in the M2 domains (of the muscle receptor subunits) that line the ion channel pore. This begs the question of whether differences in the primary sequences of the neuronal and muscle subunits in this region could account for their different anesthetic sensitivities. This seems unlikely because the amino acids that would form the pore lining in a neuronal receptor (say  $\alpha_4\beta_2$ ) are remarkably similar (not shown) to those in the muscle receptor ( $\alpha\beta\gamma\delta$ ), with

only a few conservative substitutions. Nonetheless, small differences in this region *can* result in different binding affinities for open channel blockers.<sup>23,46</sup> In addition, however, there are qualitative and quantitative differences between the anesthetic sensitivities of the neuronal receptors and that of the muscle receptor. For example, the concentration-response curves for anesthetic inhibition generally are less steep for the neuronal receptors (see tables 2 and 3). The inhibitory Hill coefficients are close to unity for all anesthetics and neuronal subunit combinations tested. For the muscle receptor, the Hill coefficients are larger than unity, suggesting that more than one anesthetic molecule could be involved in the inhibition. (An alternative explanation of the different Hill coefficients is that anesthetics affect channel inhibition and desensitization rates to different extents for the two subtypes.) Another difference is that inhibition of the neuronal receptor appears to be independent of agonist concentration (see Results section), suggesting a mechanism of inhibition different from the open channel block found with the muscle receptor<sup>23,43-45</sup>; we did not explore this finding because the technique used here (two-electrode voltage clamping of oocytes) is not best suited for an analysis of inhibition mechanisms because of the relatively slow application times of agonist and anesthetic.

One interesting possibility is that the anesthetic sensitivity of the receptors may be differentially modulated by second messenger systems,<sup>47-49</sup> and it is this that makes the neuronal receptor much more sensitive. If this were the case, it remains an open question as to whether neuronal acetylcholine receptors in intact neurons will display the same anesthetic sensitivities that we have observed in the *Xenopus* expression system. From the work published so far, it would appear that although neuronal acetylcholine receptors can be very sensitive to anesthetic inhibition,<sup>24-28</sup> they do not show the remarkable sensitivity to inhalational agents that we have observed in this study. Whether this reflects differences in the neuronal subunits involved or differences in the cellular environment remains to be seen. In this context, it is worth noting that although acetylcholine receptors expressed in oocytes often have properties that closely resemble native receptors, differences have been reported at the single channel level.<sup>50</sup> Future work with muscle and neuronal hybrid receptors and genetically engineered muscle and neuronal chimeric receptors should help determine the molecular basis of the anesthetic sensitivity of the neuronal receptors. Whatever the reasons, our results show that simple in-

halational general anesthetics can exert substantial effects on neuronal ion channels at far lower concentrations than previously shown. The  $IC_{50}$  concentrations for the three inhalational anesthetics are considerably lower ( $\sim 0.1$ – $0.3$  MAC) than the free aqueous concentrations present during general anesthesia (see table 3). In contrast, although propofol is considerably more effective at inhibiting the neuronal receptor than the muscle receptor, its  $IC_{50}$  concentration for inhibition of the neuronal receptor is three times higher than the free aqueous  $EC_{50}$  concentration needed to inhibit a purposeful response to a painful stimulus (table 3). Nonetheless, at this  $EC_{50}$  concentration ( $1.5 \mu M$ ), propofol inhibits the neuronal receptor by 30%.

What relevance do our results, showing that neuronal nAChRs are sensitive to inhibition by general anesthetics, have to mammalian general anesthesia? This is a difficult question to answer, particularly when the role of nAChRs in the brain is so uncertain.<sup>8</sup> Nonetheless, the possible importance of central nAChRs is underscored by their wide distribution within the CNS<sup>11–13</sup> and by the recent demonstration that they can modulate transmission across glutamatergic synapses.<sup>51</sup> Our results show that neuronal nAChRs can be substantially inhibited at inhalational anesthetic concentrations as low as 0.1 MAC, so these findings may have some bearing on anesthetic effects observed at subanesthetic concentrations. As the function of nAChRs in the CNS becomes better understood, it should then be possible to more accurately assess the relevance of our results to general anesthesia.

The authors thank the Medical Research Council for support, Robert Dickinson for helpful discussions, Jim Patrick and Jim Boulter for their gifts of the nAChR subunit clones, and Trevor Smart for help and advice on the care of *Xenopus*.

## References

1. Unwin N: Neurotransmitter action: Opening of ligand-gated ion channels. *Neuron* 1993; 10 (Suppl):31–41
2. Deneris ES, Connolly J, Rogers SW, Duvoisin R: Pharmacological and functional diversity of neuronal nicotinic acetylcholine receptors. *Trends Pharmacol Sci* 1991; 12:34–40
3. Patrick J, Séquela P, Vernino S, Amador M, Luetje C, Dani JA: Functional diversity of neuronal nicotinic acetylcholine receptors. *Prog Brain Res* 1993; 98:113–20
4. Galzi J-L, Changeux J-P: Neuronal nicotinic receptors: Molecular organization and regulations. *Neuropharmacology* 1995; 34:563–582
5. Karlin A, Akabas MH: Toward a structural basis for the function of nicotinic acetylcholine receptors and their cousins. *Neuron* 1995; 15:1231–44
6. Role LW: Diversity in primary structure and function of neuronal nicotinic acetylcholine receptor channels. *Curr Opin Neurobiol* 1992; 2:254–62
7. McGehee DS, Role LW: Physiological diversity of nicotinic acetylcholine receptors expressed by vertebrate neurons. *Annu Rev Physiol* 1995; 57:521–46
8. Sivilotti L, Colquhoun D: Acetylcholine receptors: too many channels, too few functions. *Science* 1995; 269:1681–2
9. Anand R, Conroy WG, Schoepfer R, Whiting P, Lindstrom J: Neuronal nicotinic acetylcholine receptors expressed in *Xenopus* oocytes have a pentameric quaternary structure. *J Biol Chem* 1991; 266:11192–8
10. Cooper E, Couturier S, Ballivet M: Pentameric structure and subunit stoichiometry of a neuronal nicotinic acetylcholine receptor. *Nature* 1991; 350:235–8
11. Dineley-Miller K, Patrick J: Gene transcripts for the nicotinic acetylcholine receptor subunit,  $\beta 4$ , are distributed in multiple areas of the rat central nervous system. *Mol Brain Res* 1992; 16:339–44
12. Court J, Clementi F: Distribution of nicotinic subtypes in human brain. *Alzheimer Dis Assoc Disord* 1995; 9(Suppl 2):6–14
13. Zoli M, Le Novère N, Hill JA, Changeux J-P: Developmental regulation of nicotinic ACh receptor subunit mRNAs in the rat central and peripheral nervous systems. *J Neurosci* 1995; 15:1912–39
14. Whiting PJ, Schoepfer R, Conroy WG, Gore MJ, Keyser KT, Shimasaki S, Esch F, Lindstrom JM: Expression of nicotinic acetylcholine receptor subtypes in brain and retina. *Mol Brain Res* 1991; 10:61–70
15. Firestone LL, Sauter J-F, Braswell LM, Miller KW: Actions of general anesthetics on acetylcholine receptor-rich membranes from *Torpedo californica*. *ANESTHESIOLOGY* 1986; 64:694–702
16. Dodson BA, Braswell LM, Miller KW: Barbiturates bind to an allosteric regulatory site on nicotinic acetylcholine receptor-rich membranes. *Mol Pharmacol* 1987; 32:119–26
17. Roth SH, Forman SA, Braswell LM, Miller KW: Actions of pentobarbital enantiomers on nicotinic cholinergic receptors. *Mol Pharmacol* 1989; 36:874–80
18. Wood SC, Forman SA, Miller KW: Short chain and long chain alkanols have different sites of action on nicotinic acetylcholine receptor channels from *Torpedo*. *Mol Pharmacol* 1991; 39:332–8
19. Lechleiter J, Gruener R: Halothane shortens acetylcholine receptor channel kinetics without affecting conductance. *Proc Natl Acad Sci U S A* 1984; 81:2929–33
20. Brett RS, Dilger JP, Yland KF: Isoflurane causes "flickering" of the acetylcholine receptor channel: observations using the patch clamp. *ANESTHESIOLOGY* 1988; 69:161–70
21. Murrell RD, Braun MS, Haydon DA: Actions of *n*-alcohols on nicotinic acetylcholine receptor channels in cultured rat myotubes. *J Physiol* 1991; 437:431–48
22. Wachtel RE: Relative potencies of volatile anesthetics in altering the kinetics of ion channels in  $BC_3HI$  cells. *J Pharmacol Exp Ther* 1995; 274:1355–61
23. Forman SA, Miller KW, Yellen G: A discrete site for general anesthetics on a postsynaptic receptor. *Mol Pharmacol* 1995; 48:574–81
24. Arimura H, Ikemoto Y: Action of enflurane on cholinergic transmission in identified *Aplysia* neurones. *Br J Pharmacol* 1986; 89:573–82
25. Franks NP, Lieb WR: Stereospecific effects of inhalational gen-



- eral anesthetic optical isomers on nerve ion channels. *Science* 1991; 254:427-30
26. McKenzie D, Franks NP, Lieb WR: Actions of general anaesthetics on a neuronal nicotinic acetylcholine receptor in isolated identified neurones of *Lymnaea stagnalis*. *Br J Pharmacol* 1995; 115:275-82
27. Yashima N, Wada A, Izumi F: Halothane inhibits the cholinergic-receptor-mediated influx of calcium in primary culture of bovine adrenal medulla cells. *ANESTHESIOLOGY* 1986; 64:466-72
28. Pocock G, Richards CD: The action of volatile anaesthetics on stimulus-secretion coupling in bovine adrenal chromaffin cells. *Br J Pharmacol* 1988; 95:209-17
29. Flood-Radoslovich P, Ramirez J, Role L: Effects of isoflurane and propofol on neuronal nicotinic receptors (abstract). *ANESTHESIOLOGY* 1995; 83:A1257
30. Snedecor GW, Cochran WG: *Statistical Methods*. 6th edition. Ames, Iowa, Iowa State University Press, 1967, pp 114-6
31. Raventós J: The action of Fluothane—A new volatile anaesthetic. *Br J Pharmacol Chemother* 1956; 11:394-410
32. Watts MT, Escarzaga M, Williams CH: Gas chromatographic headspace analysis of sevoflurane in blood. *J Chromatography* 1992; 577:289-98
33. Hall AC, Lieb WR, Franks NP: Stereoselective and non-stereoselective actions of isoflurane on the GABA<sub>A</sub> receptor. *Br J Pharmacol* 1994; 112:906-10
34. Franks NP, Lieb WR: Temperature dependence of the potency of volatile general anaesthetics. Implications for *in vitro* experiments. *ANESTHESIOLOGY* 1996; 84:716-20
35. Franks NP, Lieb WR: Molecular and cellular mechanisms of general anaesthesia. *Nature* 1994; 367:607-14
36. Harris RA, Mihic SJ, Dildy-Mayfield JE, Machu TK: Actions of anaesthetics on ligand-gated ion channels: role of receptor subunit composition. *FASEB J* 1995; 9:1454-62
37. Downie DL, Hall AC, Lieb WR, Franks NP: Effects of inhalational general anaesthetics on native glycine receptors in rat medullary neurones and recombinant glycine receptors in *Xenopus* oocytes. *Br J Pharmacol* 1996; 118:493-502
38. Machu TK, Harris RA: Alcohols and anaesthetics enhance the function of 5-hydroxytryptamine<sub>3</sub> receptors expressed in *Xenopus laevis* oocytes. *J Pharmacol Exp Ther* 1994; 271:898-905
39. Jenkins A, Franks NP, Lieb WR: Actions of general anaesthetics on 5-HT<sub>3</sub> receptors in N1E-115 neuroblastoma cells. *Br J Pharmacol* 1996; 117:1507-15
40. Hollmann M, Maron C, Heinemann S: *N*-Glycosylation site tagging suggests a three transmembrane domain topology for the glutamate receptor GluR1. *Neuron* 1994; 13:1331-43
41. Dani JA, Mayer ML: Structure and function of glutamate and nicotinic acetylcholine receptors. *Curr Opin Neurobiol* 1995; 5:310-7
42. Perouansky M, Baranov D, Salman M, Yaari Y: Effects of halothane on glutamate receptor-mediated excitatory postsynaptic currents. *ANESTHESIOLOGY* 1995; 83:109-19
43. Dilger JP, Brett RS, Lesko LA: Effects of isoflurane on acetylcholine receptor channels 1 single-channel currents. *Mol Pharmacol* 1992; 41:127-33
44. Dilger JP, Brett RS, Mody HI: The effects of isoflurane on acetylcholine receptor channels 2 currents elicited by rapid perfusion of acetylcholine. *Mol Pharmacol* 1993; 44:1056-63
45. Dilger JP, Vidal AM, Mody HI, Liu Y: Evidence for direct actions of general anaesthetics on an ion channel protein. *Anesthesiology* 1994; 81:431-42
46. Charnet P, Labarca C, Cohen BN, Davidson N, Lester HA, Pilar G: Pharmacological and kinetic properties of  $\alpha 4\beta 2$  neuronal nicotinic acetylcholine receptors expressed in *Xenopus* oocytes. *J Physiol* 1992; 450:375-94
47. Hopfield JF, Tank DW, Greengard P, Huganir RL: Functional modulation of the nicotinic acetylcholine receptor by tyrosine phosphorylation. *Nature* 1988; 336:677-80
48. Hoffman PW, Ravindran A, Huganir RL: Role of phosphorylation in desensitization of acetylcholine receptors expressed in *Xenopus* oocytes. *J Neurosci* 1994; 14:4185-95
49. Vijayaraghavan S, Huang B, Blumenthal EM, Berg DK: Arachidonic acid as a possible negative feedback inhibitor of nicotinic acetylcholine receptors on neurons. *J Neurosci* 1995; 15:3679-87
50. Edmonds B, Gibb AJ, Colquhoun D: Mechanisms of activation of muscle nicotinic acetylcholine receptors and the time course of endplate currents. *Annu Rev Physiol* 1995; 57:469-93
51. McGehee DS, Heath MJS, Gelber S, Devay P, Role LW: Nicotine enhancement of fast excitatory synaptic transmission in CNS by presynaptic receptors. *Science* 1995; 269:1692-6
52. Smith C, McEwan AI, Jhaveri R, Wilkinson M, Goodman D, Smith LR, Canada AT, Glass PSA: The interaction of fentanyl on the Cp<sub>50</sub> of propofol for loss of consciousness and skin incision. *ANESTHESIOLOGY* 1994; 81:820-8
53. Servin F, Desmonts JM, Haberer JP, Cockshott ID, Plummer GF, Farinotti R: Pharmacokinetics and protein binding of propofol in patients with cirrhosis. *ANESTHESIOLOGY* 1988; 69:887-91
